# Supplementary material
Source: ML conference proceedings conference paper supplement (https://openreview.net/forum?id=BZe6dmDk5K)
Supplement: supplementary_material [file attachment]

---

# Supplementary Materials for GAIA: Rethinking Action Quality Assessment for AI-Generated Videos

---

Zijian Chen<sup>1</sup>, Wei Sun<sup>1\*</sup>, Yuan Tian<sup>1</sup>, Jun Jia<sup>1</sup>, Zicheng Zhang<sup>1</sup>,  
Jiarui Wang<sup>1</sup>, Ru Huang<sup>2</sup>, Xionghuo Min<sup>1\*</sup>, Guangtao Zhai<sup>1\*</sup>, Wenjun Zhang<sup>1</sup>  
<sup>1</sup>Shanghai Jiao Tong University    <sup>2</sup>East China University of Science and Technology  
\*Corresponding authors

## 1 Dataset Documentation

Here we provide documentation for our dataset in the common datasheet format [11].

### 1.1 Motivation

**For what purpose was the dataset created? Was there a specific task in mind? Was there a specific gap that needed to be filled?**

We produced the dataset to fill the gaps of current research on action quality assessment (AQA) in AI-generated videos (AIGV) and evaluate the existing automatic action-quality and video-quality metrics. To the best of our knowledge, it is the first AQA dataset that evaluates action quality from causal reasoning-based perspectives. Investigations of the action quality assessment commonly conduct for specific-domain in real-world scenarios (*e.g.*, sport events and health care). Our goal is to create an AQA dataset that focuses on AI-generated scenarios.

**Who created the dataset (for example, which team, research group) and on behalf of which entity (for example, company, institution, or organization)?**

The dataset was a joint effort by Zijian Chen<sup>1</sup>, Wei Sun<sup>1</sup>, Yuan Tian<sup>1</sup>, Jun Jia<sup>1</sup>, Zicheng Zhang<sup>1</sup>, Jiarui Wang<sup>1</sup>, Ru Huang<sup>2</sup>, Xionghuo Min<sup>1</sup>, Guangtao Zhai<sup>1</sup>, and Wenjun Zhang<sup>1</sup>. The authors<sup>1</sup> are researchers affiliated with the Institute of Image Communication and Information Processing, Shanghai Jiao Tong University. The author<sup>2</sup> is with the School of Information Science & Engineering, East China University of Science and Technology.

**Who funded the creation of the dataset? If there is an associated grant, please provide the name of the grantor and the grant name and number.**

This work was supported in part by the China Postdoctoral Science Foundation under Grant Number 2023TQ0212 and 2023M742298, in part by the Postdoctoral Fellowship Program of CPSF under Grant Number GZC20231618, in part by the Shanghai Pujiang Program under Grant 22PJ1407400, and in part by the National Natural Science Foundation of China under Grant 62271312, 62301316, 62101325 and 62101326.

### 1.2 Composition

**What do the instances that comprise the dataset represent (for example, documents, photos, people, countries)? Are there multiple types of instances (for example, movies, users, and ratings; people and interactions between them; nodes and edges)?**

The instances represent video files with corresponding subjective action quality scores. Each video was generated by a text-to-video model using a prompt that contained the action keyword.

**How many instances are there in total (of each type, if appropriate)?**

The dataset has a total of 9,180 AI-generated videos with 971,244 reliable ratings (an average of 105.8 ratings per video (35.27 per dimension)).

**Does the dataset contain all possible instances or is it a sample (not necessarily random) of instances from a larger set? If the dataset is a sample, then what is the larger set? Is the sample representative of the larger set (for example, geographic coverage)?**

The dataset contains all generated instances.

**What data does each instance consist of? "Raw" data (for example, unprocessed text or images) or features?**

Each instance is a video file in .mp4 format. Each subjective score is a floating-point number. Each action keyword and the corresponding prompt are in text format.

**Is there a label or target associated with each instance?**

Each video has three subjective scores that represent the evaluated three action quality-related perspectives (*i.e.*, *subject quality*, *action completeness*, and *action-scene interaction*) with the corresponding prompt and action keyword.

**Is any information missing from individual instances?**

No.

**Are relationships between individual instances made explicit (for example, users' movie ratings, social network links)?**

We divided the action videos into groups on the basis of their action categories and their respective text-to-video models.

**Are there recommended data splits (for example, training, development/validation, testing)?**

No. In the process of benchmarking the current action quality assessment metrics, we randomly split the training-testing set at a ratio of 8:2 ten times.

**Are there any errors, sources of noise, or redundancies in the dataset?**

No

**Is the dataset self-contained, or does it link to or otherwise rely on external resources (for example, websites, tweets, other datasets)?**

The dataset is self-contained.

**Does the dataset contain data that might be considered confidential (for example, data that is protected by legal privilege or by doctor-patient confidentiality, data that includes the content of individuals' non-public communications)?**

No. All videos in our GAIA dataset are generated by text-to-video models according to the given action prompt.

**Does the dataset contain data that, if viewed directly, might be offensive, insulting, threatening, or might otherwise cause anxiety?**

No. We have organized experts to manually check the compliance and legality of the adopted action prompts as well as the generated videos to avoid such issues.

### 1.3 Collection Process

**How was the data associated with each instance acquired? Was the data directly observable (for example, raw text, movie ratings), reported by subjects (for example, survey responses), or indirectly inferred/derived from other data (for example, part-of-speech tags, model-based guesses for age or language)? If the data was reported by subjects or indirectly inferred/derived from other data, was the data validated/verified?**

We formed the dataset using 18 popular text-to-video models including 11 lab-studies and 7 commercial applications, listed in Tab 1.

Table 1: URLs for the adopted text-to-video models.

| Methods                | URL                                                                                                                                             |
|------------------------|-------------------------------------------------------------------------------------------------------------------------------------------------|
| Text2Video-Zero [14]   | <a href="https://github.com/Picsart-AI-Research/Text2Video-Zero">https://github.com/Picsart-AI-Research/Text2Video-Zero</a>                     |
| ModelScope [17]        | <a href="https://modelscope.cn/models/iic/text-to-video-synthesis/summary">https://modelscope.cn/models/iic/text-to-video-synthesis/summary</a> |
| ZeroScope [8]          | <a href="https://huggingface.co/cerspense/zeroscope_v2_576w">https://huggingface.co/cerspense/zeroscope_v2_576w</a>                             |
| LaVie [18]             | <a href="https://github.com/Vchitect/LaVie">https://github.com/Vchitect/LaVie</a>                                                               |
| Show-1 [20]            | <a href="https://github.com/showlab/Show-1">https://github.com/showlab/Show-1</a>                                                               |
| Hotshot-XL [15]        | <a href="https://github.com/hotshotco/Hotshot-XL">https://github.com/hotshotco/Hotshot-XL</a>                                                   |
| AnimateDiff [12]       | <a href="https://github.com/guoyww/AnimateDiff">https://github.com/guoyww/AnimateDiff</a>                                                       |
| VideoCrafter1-512 [9]  | <a href="https://github.com/AILab-CVC/VideoCrafter">https://github.com/AILab-CVC/VideoCrafter</a>                                               |
| VideoCrafter1-1024 [9] | <a href="https://github.com/AILab-CVC/VideoCrafter">https://github.com/AILab-CVC/VideoCrafter</a>                                               |
| VideoCrafter2 [10]     | <a href="https://github.com/AILab-CVC/VideoCrafter">https://github.com/AILab-CVC/VideoCrafter</a>                                               |
| Mora [19]              | <a href="https://github.com/lichao-sun/Mora">https://github.com/lichao-sun/Mora</a>                                                             |
| Gen-2 [1]              | <a href="https://research.runwayml.com/gen2">https://research.runwayml.com/gen2</a>                                                             |
| Genmo [2]              | <a href="https://www.genmo.ai">https://www.genmo.ai</a>                                                                                         |
| Pika [6]               | <a href="https://pika.art/home">https://pika.art/home</a>                                                                                       |
| NeverEnds [5]          | <a href="https://neverends.life">https://neverends.life</a>                                                                                     |
| MoonValley [3]         | <a href="https://moonvalley.ai">https://moonvalley.ai</a>                                                                                       |
| Morph Studio [4]       | <a href="https://www.morphstudio.com">https://www.morphstudio.com</a>                                                                           |
| Stable Video [7]       | <a href="https://www.stablevideo.com/welcome">https://www.stablevideo.com/welcome</a>                                                           |

Content types: 400 whole-body actions, 83 hand actions, and 27 facial actions. Detailed category of each action keyword in our GAIA dataset are listed in Tab. 2, Tab. 3, Tab. 4, and Tab. 5

**What mechanisms or procedures were used to collect the data (for example, hardware apparatuses or sensors, manual human curation, software programs, software APIs)? How were these mechanisms or procedures validated?**

The subjective experiments (labeling) involved a training/pre-labeling and a main study processes. During the training, we instructed all participants to have a clear and consistent understanding of all evaluated aspects and tested their eligibility via a 30-video pre-labeling. In the tutorial for each dimension, participants are guided to rate 10 generated-real video pairs with the same caption. Their answer is compared with ground-truth ratings that were developed by multiple experts. Raters needed to achieve at least 75% ratings that satisfied  $|ground\_truth - rating| < 1.5\sigma_{expert}$  to move on to the formal study. We adopted a single-stimulus methodology in this evaluation and asked participants to focus on the given action keyword as well as the corresponding prompt and evaluate three action-related dimensions of AI-generated videos, *i.e.*, *subject quality*, *action completeness*, and *action-scene interaction*, by dragging the slide button at a [0, 100] continuous rating scale (see Fig. 1). In addition to the above pre-labeling and in-process check trial, we also performed line clickers examination and calculated the inter-annotator agreement metric (Krippendorff’s  $\alpha$  [13]) as well as the SRCC score using bootstrapping to ensure the annotation quality.

**If the dataset is a sample from a larger set, what was the sampling strategy (for example, deterministic, probabilistic with specific sampling probabilities)?**

Not applicable.

**Who was involved in the data collection process (for example, students, crowdworkers, contractors) and how were they compensated (for example, how much were crowdworkers paid)?**

We recruit a total of 54 participants to participate in our subjective experiments. Each participant was compensated \$12 for each session (rating 300 videos in three dimensions) according to the current ethical standard [16].

**Over what timeframe was the data collected? Does this timeframe match the creation timeframe of the data associated with the instances (for example, recent crawl of old news articles)?**

The collection of source content in GAIA dataset took place nearly one years (from March 2023 to March 2024). The timeframe is align with the released date of the selected text-to-video models. The subjective experiments took over a month (from March 2024 to April 2024) to complete.

**Were any ethical review processes conducted (for example, by an institutional review board)?**

We have organized experts to manually check the compliance and legality of the adopted action prompts as well as the generated videos to avoid ethical issues.

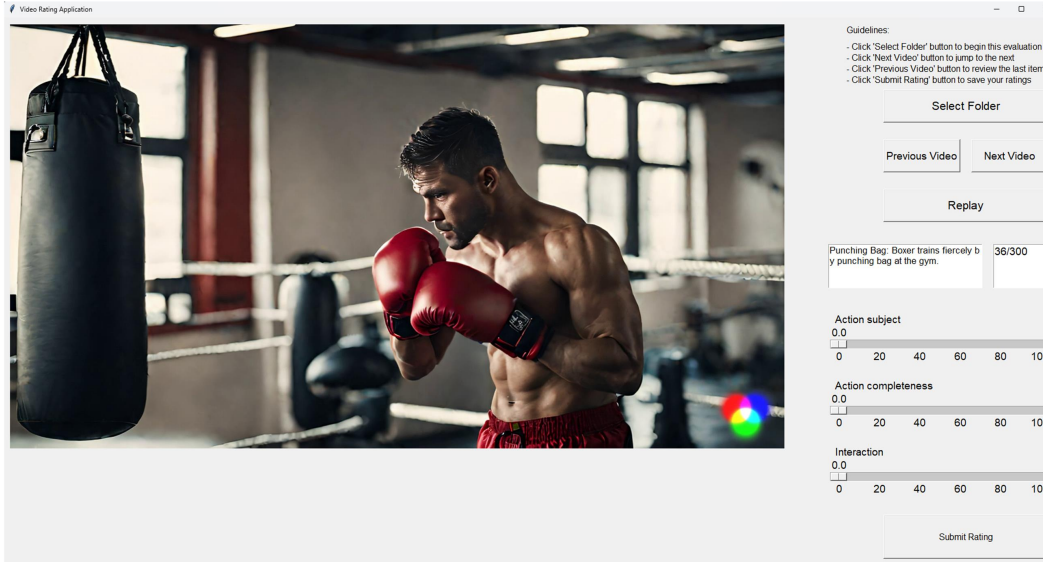

Figure 1: Screenshot of the rating interface for human evaluation. Participants are instructed to rate three action-related dimensions of AI-generated videos, *i.e.*, *subject quality*, *action completeness*, and *action-scene interaction*, based on the given action keyword and prompt.

#### 1.4 Preprocessing/Cleaning/Labeling

**Was any preprocessing/cleaning/labeling of the data done (for example, discretization or bucketing, tokenization, part-of-speech tagging, SIFT feature extraction, removal of instances, processing of missing values)?**

We directly use the generated videos from text-to-video models as source content without any change. For the collected raw user-rated scores, we performed Z-score normalization to avoid inter-annotator scoring biases.

**Was the "raw" data saved in addition to the preprocessed/cleaned/labeled data (for example, to support unanticipated future uses)?**

Yes, we saved the raw user-rated scores for all dimensions.

**Is the software that was used to preprocess/clean/label the data available?**

We conducted the subjective experiments in-lab. All data was labeled through a self-designed program based on Python Tkinter (Fig. 1).

#### 1.5 Uses

**Has the dataset been used for any tasks already?**

The dataset has served in two separate tasks:

- Measurement of action-quality metrics for AI-generated videos along with calculation of the correlation between the predicted scores and subjective scores.
- Comparing the performance of different video generation models in generating rational, artifact-free, and temporally consistent actions.

**Is there a repository that links to any or all papers or systems that use the dataset?**

The benchmark for action quality assessment in AI-generated videos is available through <https://github.com/zijianchen98/GAIA>.

**What (other) tasks could the dataset be used for?**

The dataset can be used to train or validate a new action quality assessment metric and determine whether it can reliably meet most action scenarios.

**Is there anything about the composition of the dataset or the way it was collected and pre-processed/cleaned/labeled that might impact future uses? For example, is there anything that a dataset consumer might need to know to avoid uses that could result in unfair treatment of individuals or groups (for example, stereotyping, quality of service issues) or other risks or harms (for example, legal risks, financial harms)? Is there anything a dataset consumer could do to mitigate these risks or harms?**

We applied a novel causal reasoning-based subjective evaluation strategy to collect opinions for assessing action quality. Consumers are recommended not to use the subjective score of a single dimension to compare the action quality since it is not fair.

**Are there tasks for which the dataset should not be used?**

No.

## 1.6 Distribution

**Will the dataset be distributed to third parties outside of the entity (for example, company, institution, organization) on behalf of which the dataset was created?**

The GAIA dataset is available to everyone.

**How will the dataset be distributed (for example, tarball on website, API, GitHub)? Does the dataset have a digital object identifier (DOI)?**

The GAIA dataset is accessible through <https://github.com/zijianchen98/GAIA>.

**When will the dataset be distributed?**

We are now preparing to release the dataset. All information will be noted at a Github repository <https://github.com/zijianchen98/GAIA>.

**Will the dataset be distributed under a copyright or other intellectual property (IP) license, and/or under applicable terms of use (ToU)?**

The GAIA dataset is released under the CC BY 4.0 license, which includes all associated AIGVs, scores, and their corresponding action prompts.

**Have any third parties imposed IP-based or other restrictions on the data associated with the instances?**

No.

**Do any export controls or other regulatory restrictions apply to the dataset or to individual instances?**

No.

## 1.7 Maintenance

**Who will be supporting/hosting/maintaining the dataset?**

The Shanghai Jiao Tong University MultiMedia Lab hosts the dataset. The authors of this paper support the proposed GAIA dataset and the benchmark evaluated in this paper.

**How can the owner/curator/manager of the dataset be contacted (for example, email address)?**

Contact the first author of this paper Mr. Zijian Chen by [zijian.chen@sjtu.edu.cn](mailto:zijian.chen@sjtu.edu.cn), or the corresponding author Prof. Guangtao Zhai by [zhaiguangtao@sjtu.edu.cn](mailto:zhaiguangtao@sjtu.edu.cn).

**Is there an erratum?**

No.

Table 2: Categories of the 400 whole-body actions in our proposed GAIA.

| Class                            | Action Keyword                                                                                                       |                                                                                                                                     |                                                                                                                 |                                                                                                                       |
|----------------------------------|----------------------------------------------------------------------------------------------------------------------|-------------------------------------------------------------------------------------------------------------------------------------|-----------------------------------------------------------------------------------------------------------------|-----------------------------------------------------------------------------------------------------------------------|
| Arts and crafts                  | arranging flowers<br>drawing<br>weaving basket                                                                       | blowing glass<br>knitting                                                                                                           | brush painting<br>making jewelry                                                                                | clay pottery making<br>spray painting                                                                                 |
| Athletics – jumping              | high jump<br>pole vault                                                                                              | hurdling<br>triple jump                                                                                                             | long jump                                                                                                       | parkour                                                                                                               |
| Athletics – throwing + launching | archery<br>javelin throw                                                                                             | catching or throwing frisbee<br>throwing axe                                                                                        | disc golfing<br>throwing ball                                                                                   | hammer throw<br>throwing discus                                                                                       |
| Auto maintenance                 | changing oil                                                                                                         | changing wheel                                                                                                                      | checking tires                                                                                                  | pumping gas                                                                                                           |
| Ball sports                      | bowling<br>kicking field goal<br>playing basketball<br>shooting goal (soccer)                                        | dodgeball<br>kicking soccer ball<br>playing kickball<br>shot put                                                                    | dribbling basketball<br>passing American football (in game)<br>playing volleyball                               | dunking basketball<br>passing American football (not in game)<br>shooting basketball                                  |
| Body motions                     | baby waking up<br>stretching leg<br>lunge                                                                            | bending back<br>swinging legs                                                                                                       | cracking neck<br>exercising arm                                                                                 | stretching arm<br>exercising with an exercise ball                                                                    |
| Cleaning                         | cleaning floor<br>cleaning toilet<br>mopping floor<br>washing dishes                                                 | cleaning gutters<br>cleaning windows<br>setting table                                                                               | cleaning pool<br>doing laundry<br>shining shoes                                                                 | cleaning shoes<br>making bed<br>sweeping floor                                                                        |
| Cloths                           | bandaging<br>tying knot (not on a tie)                                                                               | folding clothes<br>tying tie                                                                                                        | ironing                                                                                                         | tying bow tie                                                                                                         |
| Communication                    | answering questions<br>giving or receiving award<br>sign language interpreting                                       | auctioning<br>laughing<br>testifying                                                                                                | celebrating<br>news anchoring                                                                                   | crying<br>presenting weather forecast                                                                                 |
| Cooking                          | baking cookies<br>cooking egg<br>cutting watermelon<br>making a cake<br>making tea<br>scrambling eggs                | barbequing<br>cooking on campfire<br>flipping pancake<br>making a sandwich<br>peeling apples<br>tossing salad                       | breading or breadcrumbing<br>cooking sausages<br>frying vegetables<br>making pizza<br>peeling potatoes          | cooking chicken<br>cutting pineapple<br>grinding meat<br>making sushi<br>picking fruit                                |
| Dancing                          | belly dancing<br>country line dancing<br>dancing macarena<br>robot dancing<br>tap dancing                            | breakdancing<br>dancing ballet<br>jumpstyle dancing<br>salsa dancing<br>zumba                                                       | capoeira<br>dancing charleston<br>krumping<br>swing dancing                                                     | cheerleading<br>dancing gangnam style<br>marching<br>tango dancing                                                    |
| Eating + drinking                | bartending<br>drinking shots<br>eating chips<br>eating spaghetti<br>tasting food                                     | dining<br>eating burger<br>eating doughnuts<br>eating watermelon                                                                    | drinking<br>eating cake<br>eating hotdog<br>opening bottle                                                      | drinking beer<br>eating carrots<br>eating ice cream<br>tasting beer                                                   |
| Electronics                      | assembling computer<br>using remote controller (not gaming)                                                          | playing controller                                                                                                                  | texting                                                                                                         | using computer                                                                                                        |
| Garden + plants                  | blowing leaves<br>decorating the christmas tree<br>trimming trees                                                    | carving pumpkin<br>egg hunting<br>watering plants                                                                                   | chopping wood<br>mowing lawn                                                                                    | climbing tree<br>planting trees                                                                                       |
| Golf                             | golf chipping                                                                                                        | golf driving                                                                                                                        | golf putting                                                                                                    |                                                                                                                       |
| Gymnastics                       | bouncing on trampoline<br>vault<br>yoga                                                                              | cartwheeling<br>bench pressing                                                                                                      | gymnastics tumbling<br>doing aerobics                                                                           | somersaulting<br>situp                                                                                                |
| Hair                             | braiding hair<br>getting a haircut                                                                                   | brushing hair<br>shaving head                                                                                                       | curling hair<br>shaving legs                                                                                    | fixing hair<br>washing hair                                                                                           |
| Hands                            | air drumming<br>finger snapping                                                                                      | applauding<br>pumping fist                                                                                                          | clapping<br>drumming fingers                                                                                    | cutting nails                                                                                                         |
| Head + mouth                     | balloon blowing<br>headbanging<br>smoking<br>sticking tongue out                                                     | beatboxing<br>headbutting<br>smoking hookah<br>whistling                                                                            | blowing nose<br>shaking head<br>sneezing<br>yawning                                                             | blowing out candles<br>singing<br>sniffing<br>gargling                                                                |
| Heights                          | abseiling<br>paragliding<br>swinging on something                                                                    | bungee jumping<br>rock climbing<br>trapezing                                                                                        | climbing a rope<br>skydiving                                                                                    | climbing ladder<br>slacklining                                                                                        |
| Interacting with animals         | bee keeping<br>feeding goats<br>milking cow<br>riding elephant<br>training dog                                       | catching fish<br>grooming dog<br>petting animal (not cat)<br>riding mule<br>walking the dog                                         | feeding birds<br>grooming horse<br>petting cat<br>riding or walking with horse                                  | feeding fish<br>holding snake<br>riding camel<br>shearing sheep                                                       |
| Juggling                         | contact juggling<br>juggling soccer ball                                                                             | hula hooping<br>spinning poi                                                                                                        | juggling balls                                                                                                  | juggling fire                                                                                                         |
| Makeup                           | applying cream<br>getting a tattoo                                                                                   | doing nails                                                                                                                         | dying hair                                                                                                      | filling eyebrows                                                                                                      |
| Martial arts                     | arm wrestling<br>punching person<br>wrestling                                                                        | drop kicking<br>side kick                                                                                                           | high kick<br>sword fighting                                                                                     | punching bag<br>tai chi                                                                                               |
| Miscellaneous                    | digging<br>moving furniture<br>unloading truck                                                                       | extinguishing fire<br>spraying                                                                                                      | garbage collecting<br>stomping grapes                                                                           | laying bricks<br>tapping pen                                                                                          |
| Mobility – land                  | crawling baby<br>hoverboarding<br>pushing cart<br>riding scooter<br>skateboarding                                    | driving car<br>jogging<br>pushing wheelchair<br>riding unicycle<br>surfing crowd                                                    | driving tractor<br>motorcycling<br>riding a bike<br>roller skating<br>using segway                              | faceplanting<br>pushing car<br>riding mountain bike<br>running on treadmill<br>waiting in line                        |
| Mobility – water                 | crossing river<br>snorkeling                                                                                         | diving cliff<br>springboard diving                                                                                                  | jumping into pool<br>water sliding                                                                              | scuba diving                                                                                                          |
| Music                            | busking<br>playing cello<br>playing drums<br>playing harp<br>playing recorder<br>playing ukulele<br>strumming guitar | playing accordion<br>playing clarinet<br>playing flute<br>playing keyboard<br>playing saxophone<br>playing violin<br>tapping guitar | playing bagpipes<br>playing cymbals<br>playing guitar<br>playing organ<br>playing trombone<br>playing xylophone | playing bass guitar<br>playing didgeridoo<br>playing harmonica<br>playing piano<br>playing trumpet<br>recording music |
| Paper                            | bookbinding<br>opening present<br>shredding paper                                                                    | counting money<br>reading book<br>unboxing                                                                                          | folding napkins<br>reading newspaper<br>wrapping present                                                        | folding paper<br>ripping paper<br>writing                                                                             |
| Personal hygiene                 | brushing teeth<br>washing hands                                                                                      | taking a shower                                                                                                                     | trimming or shaving beard                                                                                       | washing feet                                                                                                          |

Table 3: Extension of Tab. 2.

| Class                | Action Keyword                                                                        |                                                                             |                                                                                      |                                                                         |
|----------------------|---------------------------------------------------------------------------------------|-----------------------------------------------------------------------------|--------------------------------------------------------------------------------------|-------------------------------------------------------------------------|
| Playing games        | flying kite<br>playing paintball<br>skipping rope                                     | hopscotch<br>playing poker<br>tossing coin                                  | playing cards<br>riding mechanical bull<br>playing monopoly                          | playing chess<br>rock scissors paper<br>shuffling cards                 |
| Racquet + bat sports | catching or throwing baseball<br>playing badminton                                    | catching or throwing softball<br>playing cricket                            | hitting baseball<br>playing squash or racquetball                                    | hurling (sport)<br>playing tennis                                       |
| Snow + ice           | biking through snow<br>ice fishing<br>shoveling snow<br>skiing slalom<br>snowmobiling | bobsledding<br>ice skating<br>ski jumping<br>sled dog racing<br>tobogganing | hockey stop<br>making snowman<br>skiing (not slalom or crosscountry)<br>snowboarding | ice climbing<br>playing ice hockey<br>skiing crosscountry<br>snowkiting |
| Swimming             | swimming backstroke                                                                   | swimming breast stroke                                                      | swimming butterfly stroke                                                            |                                                                         |
| Touching person      | carrying baby<br>massaging feet<br>slapping                                           | hugging<br>massaging legs<br>tickling                                       | kissing<br>massaging person's head                                                   | massaging back<br>shaking hands                                         |
| Using tools          | bending metal<br>plastering<br>welding                                                | blasting sand<br>sanding floor                                              | building cabinet<br>sharpening knives                                                | building shed<br>sharpening pencil                                      |
| Water sports         | canoeing or kayaking<br>sailing                                                       | jetskiing<br>surfing water                                                  | kitesurfing<br>water skiing                                                          | parasailing<br>windsurfing                                              |
| Waxing               | waxing back                                                                           | waxing chest                                                                | waxing eyebrows                                                                      | waxing legs                                                             |
| Weightlifting        | pull ups<br>front raises                                                              | push up<br>snatch weight lifting                                            | clean and jerk<br>squat                                                              | deadlifting                                                             |

Table 4: Categories of the 83 hand actions in our proposed GAIA.

| Class      | Action Keyword                                                                                                                               |                                                                                                                                                 |                                                                                                                                             |                                                                                                                         |
|------------|----------------------------------------------------------------------------------------------------------------------------------------------|-------------------------------------------------------------------------------------------------------------------------------------------------|---------------------------------------------------------------------------------------------------------------------------------------------|-------------------------------------------------------------------------------------------------------------------------|
| Move       | Wave palm towards right<br>Wave palm forward<br>Move fist upward<br>Move palm backward<br>Move palm towards left<br>Move fingers toward left | Wave palm towards left<br>Wave palm backward<br>Move fist downward<br>Move palm forward<br>Move palm towards right<br>Move fingers toward right | Wave palm downward<br>Wave finger towards left<br>Move fist towards left<br>Move palm upward<br>Move fingers upward<br>Move fingers forward | Wave palm upward<br>Wave finger towards right<br>Move fist towards right<br>Move palm downward<br>Move fingers downward |
| Zoom       | Zoom in with two fists                                                                                                                       | Zoom out with two fists                                                                                                                         | Zoom in with two fingers                                                                                                                    | Zoom out with two fingers                                                                                               |
| Rotate     | Rotate fists clockwise                                                                                                                       | Rotate fists counter-clockwise                                                                                                                  | Rotate fingers clockwise                                                                                                                    | Rotate fingers counter-clockwise                                                                                        |
| Open/close | Turn over palm<br>Put two fingers together                                                                                                   | Rotate with palm<br>Take two fingers apart                                                                                                      | Palm to fist                                                                                                                                | Fist to Palm                                                                                                            |
| Number     | Number 0<br>Number 4<br>Number 8                                                                                                             | Number 1<br>Number 5<br>Number 9                                                                                                                | Number 2<br>Number 6<br>Another number 3                                                                                                    | Number 3<br>Number 7                                                                                                    |
| Direction  | Thumb upward<br>Thumbs backward                                                                                                              | Thumb downward<br>Thumbs forward                                                                                                                | Thumb towards right                                                                                                                         | Thumb towards left                                                                                                      |
| Others     | Cross index fingers<br>OK<br>Dual hands heart                                                                                                | Sweep cross<br>Pause<br>Bent two fingers                                                                                                        | Sweep checkmark<br>Shape C<br>Bent three fingers                                                                                            | Static fist<br>Hold fist in the other hand<br>Dual fingers heart                                                        |
| Mimetic    | Click with index finger<br>take a picture<br>Knock<br>Grab (bend all five fingers)<br>Applaud                                                | Sweep diagonal<br>Make a phone call<br>Beckon<br>Walk                                                                                           | Measure (distance)<br>Wave hand<br>Trigger with thumb<br>Gather fingers                                                                     | Sweep circle<br>Wave finger<br>Trigger with index finger<br>Snap fingers                                                |
| Surprised  | curiosity<br>surprise                                                                                                                        | desire                                                                                                                                          | approval                                                                                                                                    | realization                                                                                                             |
| Fearful    | confusion<br>caring                                                                                                                          | fear                                                                                                                                            | nervousness                                                                                                                                 | relief                                                                                                                  |
| Disgusted  | disgust                                                                                                                                      | embarrassment                                                                                                                                   |                                                                                                                                             |                                                                                                                         |
| Happy      | amusement<br>optimism                                                                                                                        | love<br>pride                                                                                                                                   | joy<br>admiration                                                                                                                           | excitement<br>gratitude                                                                                                 |
| Sad        | disappointment<br>sadness                                                                                                                    | disapproval                                                                                                                                     | grief                                                                                                                                       | remorse                                                                                                                 |
| Angry      | anger                                                                                                                                        | annoyance                                                                                                                                       |                                                                                                                                             |                                                                                                                         |

Table 5: Categories of the 27 facial actions in our proposed GAIA.

| Class     | Action Keyword     |                    |                  |             |          |
|-----------|--------------------|--------------------|------------------|-------------|----------|
| Surprised | curiosity          | desire             | approval         | realization | surprise |
| Fearful   | confusion          | fear               | nervousness      | relief      | caring   |
| Disgusted | disgust            | embarrassment      |                  |             |          |
| Happy     | amusement<br>pride | love<br>admiration | joy<br>gratitude | excitement  | optimism |
| Sad       | disappointment     | disapproval        | grief            | remorse     | sadness  |
| Angry     | anger              | annoyance          |                  |             |          |

**Will the dataset be updated (for example, to correct labeling errors, add new instances, delete instances)? If so, please describe how often, by whom, and how updates will be communicated to dataset consumers (for example, mailing list, GitHub)?**

We plan to extend the dataset as the generative model evolves to ensure benchmark results with the highest statistical credibility and the latest observations. Such updates will be rare, as they involve subjective evaluation, a time-consuming task that requires extensive preparation. This does not affect the user’s use of the current dataset. All the new information will be on the dataset website <https://github.com/zijianchen98/GAIA>.

**If the dataset relates to people, are there applicable limits on the retention of the data associated with the instances (for example, were the individuals in question told that their data would be retained for a fixed period of time and then deleted)?**

Not applicable.

**Will older versions of the dataset continue to be supported/hosted/maintained?**

We do not intend to create a version history.

**If others want to extend/augment/build on/contribute to the dataset, is there a mechanism for them to do so? Will these contributions be validated/verified? If not, why not? Is there a process for communicating/distributing these contributions to dataset consumers?**

We encourage future researchers to share their ideas on extending our dataset to cover more action cases and model variants while providing more reliable results. We recommend people contacting us by [zijian.chen@sjtu.edu.cn](mailto:zijian.chen@sjtu.edu.cn) to collaborate on the subjective quality evaluation. It is recommended to build a more large-scale and comprehensive dataset based on our dataset.

## References

- [1] Gen-2. <https://research.runwayml.com/gen2>. Accessed: 2024-03-20.
- [2] Genmo. <https://www.genmo.ai/>. Accessed: 2024-03-20.
- [3] Moonvalley. <https://moonvalley.ai/>. Accessed: 2024-03-20.
- [4] Morph. <https://www.morphstudio.com>. Accessed: 2024-03-21.
- [5] Neverends. <https://neverends.life>. Accessed: 2024-03-21.
- [6] Pika. <https://pika.art/home>. Accessed: 2024-03-20.
- [7] Stable video. <https://www.stablevideo.com>. Accessed: 2024-03-21.
- [8] Zeroscope-v2-576w. [https://huggingface.co/cerspense/zeroscope\\_v2\\_576w](https://huggingface.co/cerspense/zeroscope_v2_576w). Accessed: 2024-03-20.
- [9] Haoxin Chen, Menghan Xia, Yingqing He, Yong Zhang, Xiaodong Cun, Shaoshu Yang, Jinbo Xing, Yaofang Liu, Qifeng Chen, Xintao Wang, et al. Videocrafter1: Open diffusion models for high-quality video generation. *arXiv preprint arXiv:2310.19512*, 2023.



- [10] Haoxin Chen, Yong Zhang, Xiaodong Cun, Menghan Xia, Xintao Wang, Chao Weng, and Ying Shan. Videocrafter2: Overcoming data limitations for high-quality video diffusion models. *arXiv preprint arXiv:2401.09047*, 2024.
- [11] Timnit Gebru, Jamie Morgenstern, Briana Vecchione, Jennifer Wortman Vaughan, Hanna Wallach, Hal Daumé Iii, and Kate Crawford. Datasheets for datasets. *Communications of the ACM*, 64(12):86–92, 2021.
- [12] Yuwei Guo, Ceyuan Yang, Anyi Rao, Zhengyang Liang, Yaohui Wang, Yu Qiao, Maneesh Agrawala, Dahua Lin, and Bo Dai. Animatediff: Animate your personalized text-to-image diffusion models without specific tuning. *International Conference on Learning Representations*, 2024.
- [13] Andrew F Hayes and Klaus Krippendorff. Answering the call for a standard reliability measure for coding data. *Communication methods and measures*, 1(1):77–89, 2007.
- [14] Levon Khachatryan, Andranik Movsisyan, Vahram Tadevosyan, Roberto Henschel, Zhangyang Wang, Shant Navasardyan, and Humphrey Shi. Text2video-zero: Text-to-image diffusion models are zero-shot video generators. In *Proceedings of the IEEE/CVF International Conference on Computer Vision*, pages 15954–15964, 2023.
- [15] John Mullan, Duncan Crawbuck, and Aakash Sastry. Hotshot-XL. <https://github.com/hotshotco/hotshot-xl>, October 2023.
- [16] M Six Silberman, Bill Tomlinson, Rochelle LaPlante, Joel Ross, Lilly Irani, and Andrew Zaldivar. Responsible research with crowds: pay crowdworkers at least minimum wage. *Communications of the ACM*, 61(3):39–41, 2018.
- [17] Jiuniu Wang, Hangjie Yuan, Dayou Chen, Yingya Zhang, Xiang Wang, and Shiwei Zhang. Modelscope text-to-video technical report. *arXiv preprint arXiv:2308.06571*, 2023.
- [18] Yaohui Wang, Xinyuan Chen, Xin Ma, Shangchen Zhou, Ziqi Huang, Yi Wang, Ceyuan Yang, Yinan He, Jiashuo Yu, Peiqing Yang, et al. Lavie: High-quality video generation with cascaded latent diffusion models. *arXiv preprint arXiv:2309.15103*, 2023.
- [19] Zhengqing Yuan, Ruoxi Chen, Zhaoxu Li, Haolong Jia, Lifang He, Chi Wang, and Lichao Sun. Mora: Enabling generalist video generation via a multi-agent framework. *arXiv preprint arXiv:2403.13248*, 2024.
- [20] David Junhao Zhang, Jay Zhangjie Wu, Jia-Wei Liu, Rui Zhao, Lingmin Ran, Yuchao Gu, Difei Gao, and Mike Zheng Shou. Show-1: Marrying pixel and latent diffusion models for text-to-video generation. *arXiv preprint arXiv:2309.15818*, 2023.
